# Supplementary material
Source: MDPI journal article supplement (https://www.mdpi.com/2077-0472/11/2/120)
Supplement: s1 [file s1]

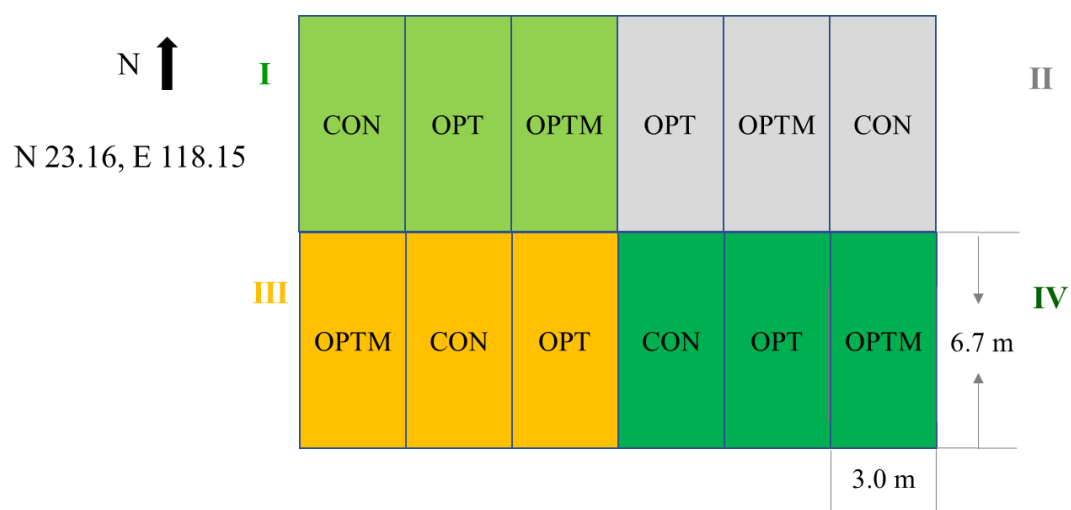

**Supplementary Figure. S1.** Random distribution of three types of fertilized plots in an experimental tea field in Anxi, Fujian.

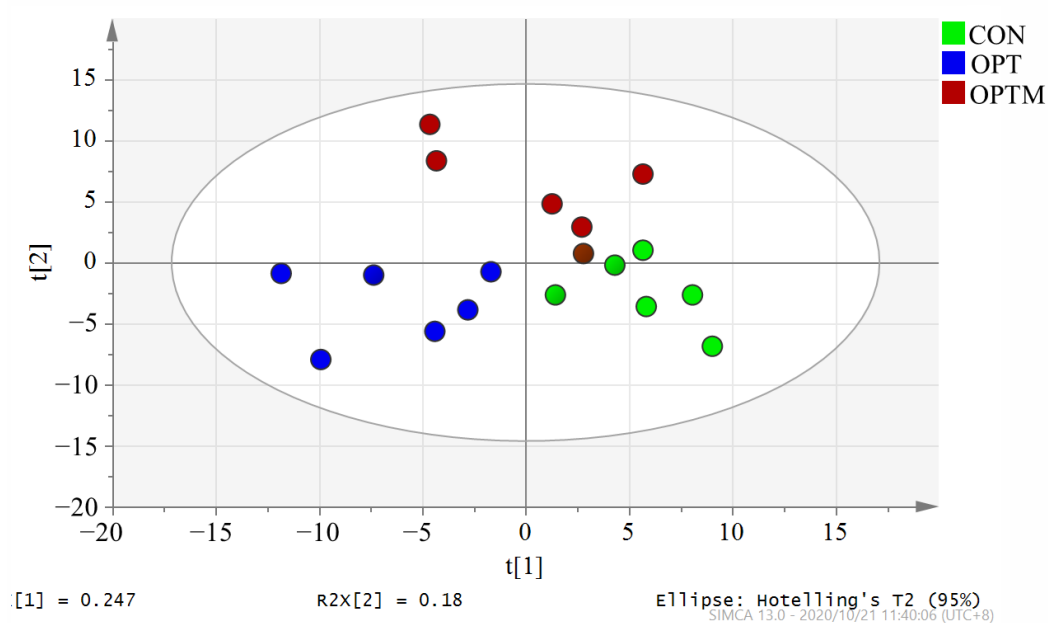

**Supplementary Figure. S2.** PCA score plots derived from non-targeted metabolite profiling of three different treatments analyzed by HPLC-TOF-MS and GC-TOF-MS.

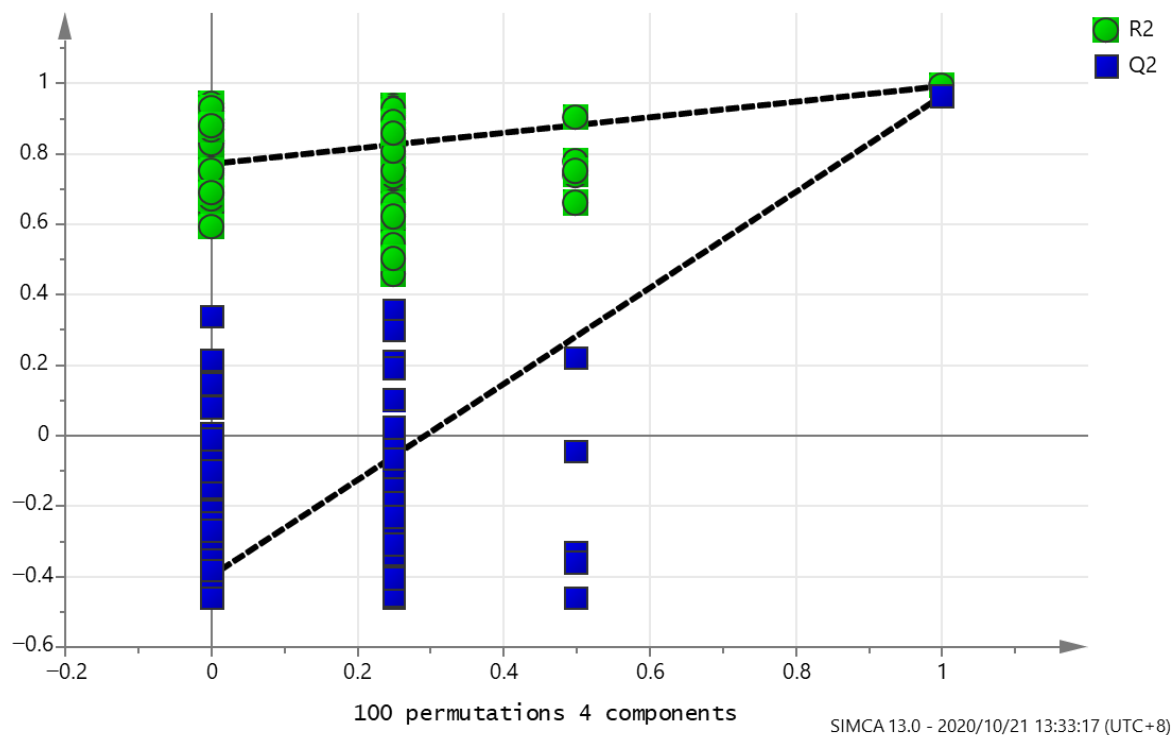

**Supplementary Figure. S3.** The response permutation test ( $n = 100$ ) to estimate the statistical significance of the PLS-DA model. The value of the  $R^2$  and  $Q^2$  on the extreme right-hand side of the plot and always larger than the corresponding values of the models fitted to the permuted response.  $Y$ -axis intercepts:  $R^2 = 0.75$  and  $Q^2 = -0.40$ , showed a low risk of over fitting and reliable [1,2].

1. Xu, J. L.; Shin, J. S.; Park, S. K.; Kang, S.; Jeong, S. C.; Moon, J. K.; Choi, Y. Differences in the metabolic profiles and antioxidant activities of wild and cultivated black soybeans evaluated by correlation analysis. *Food Res Int.* **2017**, *100*, 166-174. <https://doi.org/10.1016/j.foodres.2017.08.026>.
2. Wang R.; De Gruttola V. The use of permutation tests for the analysis of parallel and stepped-wedge cluster-randomized trials. *Stat Med*, *2017*, *36*, 2831-2843. <https://doi.org/10.1002/sim.7329>.
